# Supplementary material for: Mutation in the Hair Cell Specific Gene POU4F3 Is a Common Cause for Autosomal Dominant Nonsyndromic Hearing Loss in Chinese Hans
Source: PubMed Central journal article supplement (PMC5178374; doi:10.1155/2016/9890827), 2016-12-08
Supplement: 9890827.f1.pdf [file 9890827.f1.pdf]

# **Mutations in the hair cell specific gene *POU4F3* is a common cause for autosomal dominant non-syndromic hearing loss in Chinese Hans**

Longxia He<sup>§1,2,3</sup>, Xiuhong Pang<sup>§4</sup>, Penghui Chen<sup>§1,2,3</sup>, Hao Wu<sup>\*1,2,3,5</sup> and Tao Yang<sup>\*1,2,3</sup>

<sup>1</sup>Department of Otolaryngology–Head and Neck Surgery, Xinhua Hospital, Shanghai Jiaotong University School of Medicine, Shanghai, China

<sup>2</sup>Ear Institute, Shanghai Jiaotong University School of Medicine, Shanghai, China

<sup>3</sup>Shanghai Key Laboratory of Translational Medicine on Ear and Nose Diseases, Shanghai, China

<sup>4</sup>Department of Otorhinolaryngology-Head and Neck Surgery, Taizhou People’s Hospital, Jiangsu Province, China

<sup>5</sup>Department of Otorhinolaryngology-Head and Neck Surgery, Shanghai Ninth People’s Hospital, Shanghai Jiaotong University School of Medicine, Shanghai, China

<sup>§</sup>These authors contributed equally to this work

## **\*Corresponding Authors:**

Tao Yang, Ear Institute, Shanghai Jiaotong University School of Medicine, Shanghai, China.

Email: yangtfxl@sina.com

Hao Wu, Department of Otolaryngology-Head & Neck Surgery, Shanghai Ninth People’s Hospital, Shanghai Jiaotong University School of Medicine, Shanghai, China. Email:

wuhao622@sina.cn

**Supplementary Table S1.** The 144 genes targeted for the next-generation Sequencing for deafness.

|              |        |         |              |        |              |         |
|--------------|--------|---------|--------------|--------|--------------|---------|
| ACTG1        | COL9A1 | FGF8    | HSD17B4      | MYO15A | PROKR2       | TBC1D24 |
| ALX3         | COL9A2 | FGFR1   | IL13         | MYO1A  | PRPS1        | TCOF1   |
| BSND         | COMT2  | FGFR3   | ILDR1        | MYO3A  | PTPRQ        | TECTA   |
| CABP2        | CRYM   | FLNA    | KARS         | MYO6   | RDX          | TIMM8A  |
| CCDC50       | DFNA5  | FOXI1   | KCNE1        | MYO7A  | RPGR         | TJP2    |
| CDH23        | DFNB31 | FREM1   | KCNJ10       | NDP    | SALL1        | TMC1    |
| CEACAM<br>16 | DFNB59 | GATA3   | KCNQ1        | NF2    | SALL4        | TMIE    |
| CHD7         | DIABLO | GIPC3   | KCNQ4        | OTOA   | SANS         | TMPRSS3 |
| CIB2         | DIAPH1 | GJB2    | KRT9         | OTOF   | SEC23A       | TNC     |
| CLDN14       | DIAPH3 | GJB3    | LAMA3        | P2RX2  | SEMA3E       | TPRN    |
| CLPP         | DSPP   | GJB6    | LARS2        | PABPN1 | SERPINB<br>6 | TRIOBP  |
| CLRN1        | ECM1   | GPR98   | LHFPL5       | PAX3   | SIX1         | TRMU    |
| COCH         | EDN3   | GPSM2   | LOXHD1       | PCDH15 | SIX5         | TSPEAR  |
| COL11A1      | EDNRB  | GRHL2   | LRTOMT       | PDZD7  | SLC17A8      | USH1C   |
| COL11A2      | ELMOD3 | GRXCR1  | MARVEL<br>D2 | PNPT1  | SLC26A4      | USH1G   |
| COL2A1       | ESPN   | HARS    | MIR96        | POLR1C | SLC26A5      | USH2A   |
| COL4A3       | ESRRB  | HARS2   | MITF         | POLR1D | SMPX         | WFS1    |
| COL4A4       | EYA1   | HGF     | MSRB3        | POU3F4 | SNAI2        | WHRN    |
| COL4A5       | EYA4   | HMX1    | MYH14        | POU4F3 | SOX10        | RNR1    |
| COL4A6       | FGF3   | HOXA2   | MYH9         | PROK2  | STRC         | TS1     |
| CO1          | miR-96 | miR-182 | miR-183      |        |              |         |

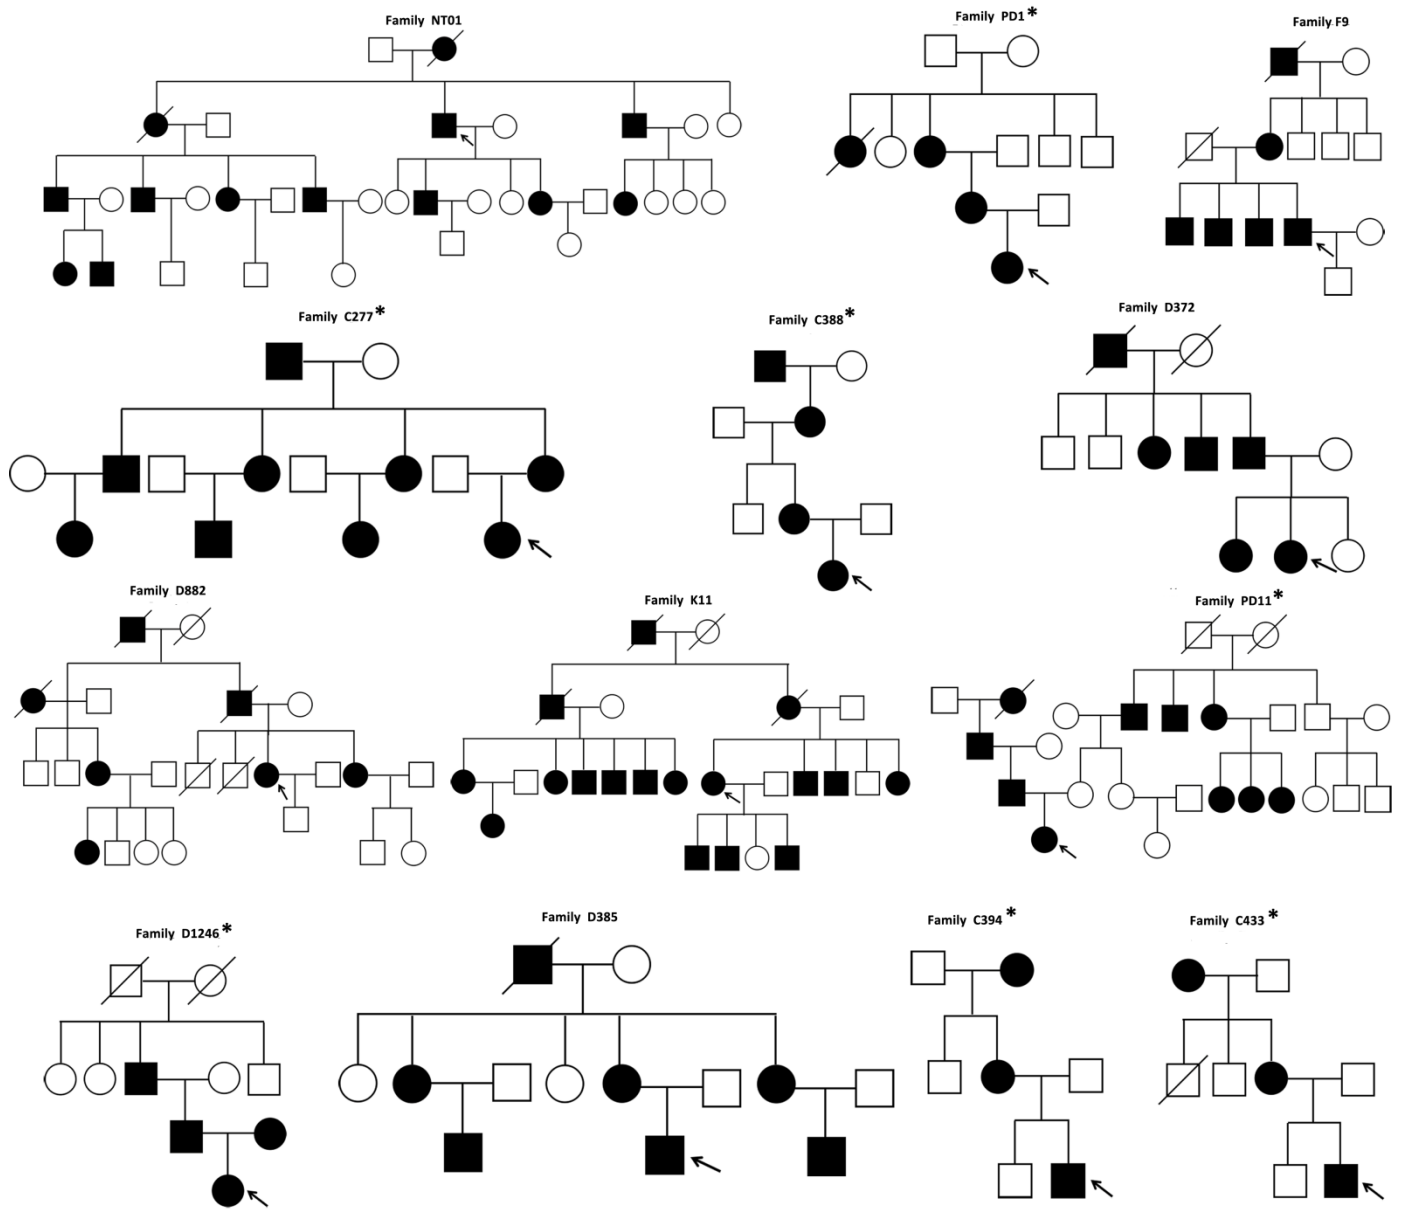

**Supplementary Figure S1.** The thirteen additional Chinese Han ADNSHL families without *POU4F3* mutations identified by targeted NGS. Asterisks indicate the families screened in the present study. Probands were pointed by arrows.
